# Supplementary material for: Evaluating protocols for reproducible targeted metabolomics by NMR
Source: Royal Society of Chemistry journal article supplement (doi:10.1039/d4an01015a), 2024-01-01
Supplement: d4an01015a2.xlsx [file d4an01015a2.xlsx]

## Sheet: Supplemental Information
Supplemental Information for
Evaluating Protocols for Reproducible Targeted Metabolomics by NMR
Darcy Cochran,1,2 Panteleimon G. Takis3,4*, James L. Alexander5,6,7, Benjamin J. Mullish5,6, Nick Powell5,6, Julian R. Marchesi6 and Robert Powers1,2*
1Department of Chemistry, University of Nebraska-Lincoln, Lincoln, Nebraska, 68588-0304, USA
2Nebraska Center for Integrated Biomolecular Communication, University of Nebraska-Lincoln, Lincoln, Nebraska, 68588-0304, USA
3Department of Chemistry, University of Ioannina, Ioannina GR 451 10, Greece
4Section of Bioanalytical Chemistry, Division of Systems Medicine, Department of Metabolism, Digestion and Reproduction, Imperial College London, London SW7 2AZ, UK National Phenome Centre, Department of Metabolism, Digestion and Reproduction, Imperial College London, London W12 0NN, UK
5Departments of Gastroenterology and Hepatology, St Mary’s Hospital, Imperial College Healthcare NHS Trust, South Wharf Road, Paddington London, W2 1NY, UK
6Division of Digestive Diseases, Department of Metabolism, Digestion and Reproduction, Faculty of Medicine, Imperial College London, W2, 1NY, UK
7Department of Gastroenterology, St. Mark’s Hospital and Academic Institute, Middlesex, UK
*To whom correspondence should be addressed:
Panteleimon G. Takis
University of Ioannina
Department of Chemistry
Dourouti 451 10,
Ioannina, Greece
Email: ptakis@uoi.gr
Phone: (+30) 2651008348
and
Robert Powers
University of Nebraska-Lincoln
Department of Chemistry
722 Hamilton Hall
Lincoln, NE 68588-0304
Email: rpowers3@unl.edu
Phone: (402) 472-3039
Fax: (402) 472-9402

## Sheet: S1 - Sample Demographics
Table S1: Metadata corresponding to the 69 individual plasma sample donors.
Sample #	Clinical Group	Age	Gender
5	Crohn's Disease	35.5	Male
9	Crohn's Disease	39.4	Male
12	Crohn's Disease	40.5	Female
16	Crohn's Disease	55	Female
18	Crohn's Disease	50.1	Male
20	Crohn's Disease	37.7	Female
28	Crohn's Disease	36.9	Male
34	Crohn's Disease	46.9	Male
40	Crohn's Disease	49.5	Female
44	Crohn's Disease	30.5	Female
46	Crohn's Disease	41.4	Female
47	Crohn's Disease	56.5	Female
48	Crohn's Disease	74.7	Male
53	Crohn's Disease	37.3	Male
56	Crohn's Disease	38.1	Male
61	Crohn's Disease	24.8	Female
62	Crohn's Disease	62	Male
64	Crohn's Disease	41	Male
65	Crohn's Disease	28	Male
66	Crohn's Disease	52.3	Male
69	Crohn's Disease	50	Male
2	Ulcerative Colitis	51.2	Male
4	Ulcerative Colitis	28.5	Female
6	Ulcerative Colitis	33.9	Male
8	Ulcerative Colitis	29.4	Male
10	Ulcerative Colitis	47.2	Female
11	Ulcerative Colitis	32.5	Male
15	Ulcerative Colitis	66.7	Male
19	Ulcerative Colitis	35.1	Female
21	Ulcerative Colitis	38.1	Female
23	Ulcerative Colitis	61	Male
24	Ulcerative Colitis	30.4	Male
25	Ulcerative Colitis	25.1	Male
27	Ulcerative Colitis	39.1	Female
29	Ulcerative Colitis	67	Male
31	Ulcerative Colitis	29.6	Female
32	Ulcerative Colitis	46.2	Male
35	Ulcerative Colitis	57.6	Male
36	Ulcerative Colitis	36.9	Male
38	Ulcerative Colitis	38.8	Female
42	Ulcerative Colitis	31.8	Female
43	Ulcerative Colitis	59.4	Male
52	Ulcerative Colitis	23.7	Male
57	Ulcerative Colitis	44.8	Male
68	Ulcerative Colitis	64.4	Male
1	Control	40.8	Female
3	Control	61.3	Female
7	Control	45.5	Male
13	Control	57.4	Male
14	Control	54.3	Male
17	Control	63.8	Female
22	Control	44.3	Male
26	Control	31.6	Female
30	Control	48.5	Male
33	Control	37.4	Male
37	Control	52.1	Male
39	Control	30.2	Female
41	Control	46.2	Female
45	Control	36.2	Female
49	Control	36.4	Male
50	Control	33.9	Male
51	Control	24.7	Female
54	Control	37.2	Female
55	Control	41	Male
58	Control	22.8	Male
59	Control	42.2	Female
60	Control	33.5	Male
63	Control	52.9	Male
67	Control	28.8	Female

## Sheet: S2 - Metabolite List
Table S2: List of common names and human metabolome database ID numbers for the 25 targeted metabolites analyzed in this study
Common Name	HMDB ID
2-HYDROXYBUTYRATE	HMDB0000008
3-HYDROXYBUTYRATE	HMDB0000011
ACETATE	HMDB0000042
ACETONE	HMDB0001659
ALANINE	HMDB0000161
CHOLINE	HMDB0000097
CITRATE	HMDB0000094
CREATINE	HMDB0000064
CREATININE	HMDB0000562
DIMETHYL SULFONE	HMDB0004983
DIMETHYLAMINE	HMDB0000087
FORMATE	HMDB0304356
GLUCOSE	HMDB0000122
GLUTAMINE	HMDB0000641
GLUTAMATE	HMDB0000148
GLYCEROL	HMDB0000131
GLYCINE	HMDB0000123
HISTIDINE	HMDB0000177
ISOLEUCINE	HMDB0000172
LACTATE	HMDB0000190
LEUCINE	HMDB0000687
LYSINE	HMDB0000182
METHANOL	HMDB0001875
PHENYLALANINE	HMDB0000159
PYRUVATE	HMDB0000243
TYROSINE	HMDB0000158
VALINE	HMDB0000883

## Sheet: S3 - Metabolite Concentrations
Table S3: Scaled Metabolite Concentrations for each Sample Preparation and Data Processing Method
	Precipitated															Filtered																Intact
	Chenomx - Manual Fit			Chenomx - Assisted Fit				Chenomx - Batch Fit				SMolESY				Chenomx - Manual Fit				Chenomx - Assisted Fit				Chenomx - Batch Fit				SMolESY				Chenomx - Batch Fit-CPMG				SMolESY - NOESY				SMolESY - CPMG
	Mean	StDev	CV (%)	Mean	StDev	CV (%)	% Diff	Mean	StDev	CV (%)	% Diff	Mean	StDev	CV (%)	% Diff	Mean	StDev	CV (%)	% Diff	Mean	StDev	CV (%)	% Diff	Mean	StDev	CV (%)	% Diff	Mean	StDev	CV (%)	% Diff	Mean	StDev	CV (%)	% Diff	Mean	StDev	CV (%)	% Diff	Mean	StDev	CV (%)	% Diff		%Diff (SMoIESY)	p-values
2-Hydroxybutyrate	0.371444	0.192047	51.7029	0.391747	0.211829	54.0729	-0.0546594	0.159088	0.217876	136.953	0.571703	0.142974	0.167223	116.961	0.615087	0.0828144	0.0636805	76.8954	0.777047	0.0799406	0.0555681	69.5117	0.784784	0.0171441	0.0145864	85.0812	0.953845	0.102283	0.0696033	68.0499	0.724634	0.0154628	-	-	0.958371	0.0865712	0.101332	117.05	0.766933	0.154496	0.150309	97.2898	0.584065		-0.784615	0.0065
3-Hydroxybutyrate	0.188105	0.157677	83.8241	0.17872	0.156394	87.508	0.0498916	0.552381	0.351418	63.6188	-1.93656	0.169859	0.2003	117.922	0.0969978	0.0530824	0.0604174	113.818	0.717803	0.04893	0.0611004	124.873	0.739879	0.215155	0.264837	123.091	-0.143807	0.14896	0.177798	119.36	0.208099	0.177143	-	-	0.0582742	0.112949	0.11314	100.17	0.399542	0.0502075	0.120382	239.769	0.733087		0.555485	0.0027
Acetate	0.146811	0.141716	96.5295	0.136949	0.139696	102.006	0.0671773	0.140881	0.136054	96.5741	0.0403953	0.291032	0.184639	63.4429	-0.982357	0.0515392	0.0265671	51.5474	0.648942	0.0506659	0.0263778	52.0622	0.65489	0.0656131	0.0391118	59.6097	0.553077	0.280174	0.149583	53.3892	-0.908397	0.160556	-	-	-0.0936254	0.160282	0.132453	82.6377	-0.0917576	0.129357	0.168421	130.199	0.118889		0.192942	0.2463
Acetone	0.12574	0.15083	119.954	0.119725	0.150769	125.93	0.0478385	0.0724614	0.141713	195.571	0.423722	0.0895786	0.146259	163.274	0.28759	0.0737839	0.0780335	105.76	0.413204	0.0814585	0.0863652	106.024	0.352169	0.081542	0.0885727	108.622	0.351505	0.106444	0.131498	123.538	0.153462	0.0639854	-	-	0.491131	0.280926	0.186771	66.4843	-1.23417	0.204284	0.196416	96.1487	-0.624649		0.272819	0.0173
Alanine	0.114061	0.127997	112.218	0.10755	0.123259	114.606	0.0570812	0.280456	0.165253	58.9229	-1.45884	0.182945	0.0774153	42.3162	-0.603924	0.053745	0.0239628	44.5861	0.528804	0.0541967	0.0239591	44.2077	0.524843	0.161447	0.072229	44.7386	-0.415445	0.279236	0.0911354	32.6374	-1.44813	0.407677	0.39763	97.5356	-2.57421	0.39312	0.207993	52.9083	-2.44659	0.439195	0.248837	56.6576	-2.85054		-0.117203	0.2055
Choline	0.175328	0.151063	86.16	0.17303	0.152306	88.0231	0.0131117	-	-	-	-	0.203961	0.0881864	43.237	-0.163307	0.0433498	0.0202804	46.7831	0.752751	0.0433498	0.0202804	46.7831	0.752751	0.386364	0.330719	85.5978	-1.20366	0.156336	0.0554736	35.4835	0.108322	0	-	-	1	0.391416	0.209248	53.4592	-1.23247	0.422789	0.198647	46.985	-1.41141		-0.0801512	0.3917
Citrate	0.0823508	0.136105	165.275	0.114713	0.136821	119.272	-0.392984	0.0386266	-	-	0.53095	0.108587	0.0544167	50.1134	-0.318592	0.0593031	0.0295333	49.8007	0.279872	0.111848	0.0696394	62.2623	-0.358194	0.410791	0.315	76.6813	-3.98831	0.327089	0.0983351	30.0638	-2.97189	-	-	-	-	0.5041	0.19002	37.6949	-5.12137	0.490869	0.223017	45.4332	-4.96071		0.0262468	0.7755
Creatine	0.063273	0.124303	196.456	0.0599033	0.124743	208.24	0.053256	0.0953579	0.12958	135.888	-0.507087	0.185996	0.122097	65.6448	-1.93958	0.0301559	0.0246665	81.7966	0.523401	0.0253882	0.0154061	60.6822	0.598751	0.0645646	0.0305138	47.2608	-0.0204133	0.138443	0.0976466	70.5321	-1.18802	0.10884	-	-	-0.720166	0.294596	0.186039	63.1507	-3.65595	0.278585	0.181284	65.073	-3.40291		0.0543465	0.7514
Creatinine	0.277346	0.160425	57.8429	0.158524	0.128683	81.176	0.428427	0.244554	0.198331	81.0992	0.118236	0.338347	0.138936	41.0632	-0.219944	0.148694	0.0661394	44.4802	0.463868	0.0710798	0.0307509	43.2624	0.743714	0.197939	0.0987174	49.8727	0.28631	0.292296	0.105381	36.0528	-0.0539049	0.128	-	-	0.538483	0.3413	0.174642	51.1697	-0.230593	0.31858	0.182381	57.2481	-0.148672		0.0665703	0.5034
Dimethyl sulfone	0.112082	0.147155	131.292	0.109259	0.147271	134.791	0.0251845	0.223707	0.434475	194.216	-0.995921	0.037511	0.117239	312.546	0.665326	0.0494142	0.0822741	166.499	0.559125	0.0481555	0.0821485	170.59	0.570355	0.0743534	0.140021	188.319	0.336616	0.051792	0.107884	208.302	0.53791	0.0538793	-	-	0.519287	0.0717499	0.12955	180.558	0.359845	0.0649691	0.133718	205.818	0.420344		0.0945061	0.6521
Dimethylamine	0.1229	0.2064	167.942	0.117052	0.207128	176.954	0.0475831	0.384409	0.533579	138.805	-2.12782	0.0228369	0.118607	519.364	0.814183	0.0188964	0.0267697	141.665	0.846245	0.0187373	0.0266471	142.214	0.84754	0.055838	0.151984	272.188	0.545662	0.0199171	0.101717	510.703	0.83794	-	-	-	-	0.0332125	0.0983121	296.009	0.729759	0.0366627	0.118365	322.849	0.701686		-0.103883	0.5957
Formate	0.116065	0.122076	105.178	0.115207	0.121344	105.326	0.00739345	0.275309	0.16415	59.6237	-1.37202	0.186231	0.135377	72.6931	-0.604535	0.0421462	0.0176317	41.8347	0.636875	0.0421462	0.0176317	41.8347	0.934434	0.134648	0.0568743	42.2393	-0.160103	0.0938575	0.0541489	57.6927	0.19134	0.162791	-	-	-0.402577	0.296591	0.186314	62.8183	-1.55538	0.372264	0.202819	54.4827	-2.20736		-0.255142	0.0369
Glucose	0.192311	0.151339	78.6948	0.186122	0.168594	90.5824	0.0321795	0.181529	0.136654	75.2798	0.0560668	0.196584	0.0975265	49.6106	-0.0222197	0.0973512	0.0552874	56.7917	0.493782	0.0938431	0.0538896	57.4253	0.688215	0.119042	0.0559703	47.0171	0.380989	0.157654	0.0887034	56.2647	0.180213	0.211421	0.140617	66.5101	-0.0993734	0.242641	0.157331	64.8413	-0.261711	0.197632	0.153332	77.5845	-0.0276724		0.185493	0.1321
Glutamate	0.557992	0.321158	57.5561	0.557992	0.321158	57.5561	0	0.703901	0.418748	59.4896	-0.26149	0.329886	0.154287	46.7699	0.408798	0.293579	0.172272	58.6802	0.473866	0.293579	0.172272	58.6802	0.621001	0.279433	0.227351	81.3615	0.499217	0.316705	0.142205	44.9014	0.43242	-	-	-	-	0.220951	0.145954	66.0573	0.604025	0.164124	0.132666	80.8327	0.705867		0.257193	0.0132
Glutamine	0.151502	0.123501	81.5177	0.118261	0.122226	103.353	0.219414	0.350909	0.173165	49.3477	-1.31619	0.278074	0.0735876	26.4633	-0.83544	0.05676	0.0262016	46.1621	0.625352	0.0417484	0.0217346	52.061	1.13587	0.191657	0.0899318	46.9234	-0.26504	0.234714	0.0662271	28.2161	-0.549239	0.245807	-	-	-0.622463	0.447428	0.169468	37.8761	-1.95327	0.40341	0.194366	48.1807	-1.66273		0.0983801	0.1056
Glycine	0.0742524	0.119487	160.92	0.0743766	0.119427	160.571	-0.00167195	0.105627	0.122664	116.129	-0.422543	0.177406	0.0920359	51.8786	-1.38923	0.0472195	0.0507901	107.562	0.364068	0.0481337	0.0507881	105.514	0.426824	0.0691311	0.0790953	114.413	0.0689715	0.452021	0.163203	36.1052	-5.08763	0.0753212	0.0665202	88.3154	-0.0143933	0.34361	0.179048	52.1077	-3.6276	0.379288	0.206164	54.3555	-4.10809		-0.103831	0.2317
Histidine	0.200296	0.139677	69.7352	0.188823	0.147527	78.13	0.0572826	-	-	-	-	0.307852	0.133219	43.2738	-0.536986	0.120576	0.0371814	30.8366	0.398014	0.127448	0.0389018	30.5237	0.444543	0.248699	0.095853	38.5417	-0.241659	0.271112	0.122006	45.0023	-0.353554	0.427171	0.439773	102.95	-1.1327	0.478941	0.181476	37.891	-1.39116	0.472998	0.193846	40.9823	-1.3615		0.0124076	0.7514
Isoleucine	0.139338	0.131619	94.4603	0.13122	0.125989	96.013	0.0582579	0.309464	0.177266	57.2816	-1.22096	0.362496	0.132108	36.4439	-1.60156	0.0567909	0.0270468	47.6253	0.592424	0.0509662	0.0307534	60.3407	0.928742	0.0815261	0.0583387	71.5583	0.414904	0.267128	0.0916273	34.301	-0.91712	0.509036	0.685808	134.727	-2.65325	0.417531	0.223235	53.4654	-1.99653	0.479499	0.259535	54.1263	-2.44127		-0.148415	0.1457
Lactate	0.140557	0.129018	91.7902	0.140438	0.128814	91.7228	0.000844946	0.286309	0.205276	71.6975	-1.03696	0.385987	0.210711	54.5901	-1.74612	0.0769827	0.0430746	55.9536	0.452303	0.0769827	0.0430746	55.9536	0.584485	0.229568	0.130005	56.6303	-0.633274	0.384384	0.182799	47.5563	-1.73472	0.146649	-	-	-0.0433429	0.213872	0.156025	72.9524	-0.521603	0.182491	0.159572	87.4408	-0.298341		0.146728	0.2727
Leucine	0.158493	0.133144	84.006	0.155745	0.132089	84.8111	0.0173384	0.107773	0.154037	142.927	0.320014	0.347383	0.120349	34.6445	-1.19179	0.0687271	0.0356835	51.9206	0.566372	0.0672672	0.0349256	51.9206	0.808165	0.0141498	-	-	0.910723	0.263607	0.0968923	36.7564	-0.663207	0.609234	0.0648955	10.652	-2.84392	0.374175	0.203844	54.4782	-1.36083	0.395283	0.244671	61.8978	-1.49401		-0.0564108	0.4265
Lysine	0.179164	0.125815	70.2232	0.178467	0.126145	70.6828	0.00389354	-	-	-	-	0.264043	0.116074	43.9603	-0.47375	0.0808771	0.0353223	43.6741	0.548587	0.0809361	0.035314	43.632	0.75531	0.00560399	0.00792523	141.421	0.968722	0.233001	0.0756028	32.4474	-0.300487	1	-	-	-4.58147	0.537019	0.244477	45.5249	-1.99735	0.37711	0.217019	57.548	-1.10483		0.297772	0.0001
Phenylalanine	0.140797	0.122754	87.1849	0.161164	0.121224	75.2182	-0.144653	0.478788	0.539972	112.779	-2.40056	0.518768	0.171069	32.976	-2.68451	0.0426427	0.0191711	44.9574	0.697133	0.0659433	0.0274363	41.6059	0.724133	0.554182	0.263113	47.4777	-2.93604	0.214122	0.0927613	43.3218	-0.520782	0.442424	-	-	-2.14229	0.223351	0.11212	50.199	-0.586331	0.200488	0.141702	70.6786	-0.423949		0.102364	0.3524
Pyruvate	0.122889	0.124568	101.366	0.150963	0.131207	86.9135	-0.228451	0.129152	0.129162	100.008	-0.0509644	0.283414	0.16797	59.2668	-1.30627	0.0562864	0.0236204	41.9647	0.541973	0.0714414	0.0300262	42.0292	0.529484	0.0594115	0.0312903	52.6671	0.516542	0.231249	0.113729	49.1805	-0.881773	0.0287226	-	-	0.766271	0.304978	0.177881	58.3258	-1.48174	0.338441	0.227566	67.2395	-1.75404		-0.109721	0.2573
Tyrosine	0.137928	0.122521	88.8291	0.12551	0.119704	95.3745	0.0900359	0.430686	0.213652	49.6073	-2.12253	0.283324	0.125153	44.1729	-1.05414	0.045108	0.0249126	55.2289	0.672961	0.046146	0.0267944	58.0644	0.997231	0.293418	0.144382	49.2069	-1.12732	0.224411	0.0793497	35.3591	-0.627011	0.45671	-	-	-2.31121	0.378267	0.192148	50.7969	-1.74248	0.437789	0.224044	51.1763	-2.17403		-0.157354	0.0887
Valine	0.119813	0.125875	105.059	0.109953	0.122225	111.16	0.082295	0.341141	0.172702	50.625	-1.84726	0.230211	0.0817984	35.5319	-0.921415	0.0477837	0.020925	43.791	0.601182	0.0473753	0.0229455	48.4336	0.866544	0.20235	0.0838013	41.4141	-0.688872	0.194355	0.0635735	32.71	0.474533	0.528233	0.489793	92.723	-3.40879	0.395481	0.206465	52.2059	-2.30081	0.442667	0.24373	55.0595	-2.69463		-0.119312	0.2993
Average	0.168434	0.147531	101.829	0.162456	0.147463	104	0.0214427	0.267841	0.234082	97.4497	-0.773482	0.237011	0.129063	86.7264	-0.628307	0.0719043	0.0436578	66.0246	0.567038	0.0715083	0.0441893	66.8197	0.666259	0.168543	0.119593	82.1639	-0.201474	0.217652	0.104755	74.717	-0.57428	0.270867	0.326434	84.7733	-0.877816	0.301802	0.170611	74.4333	-1.27718	0.297339	0.188912	89.0022	-1.2755		0.0130886
Number/Average positive						19	0.0714993			7	0.294441			6	0.48133			25	0.567038			24	0.708944			13	0.522083			10	0.384887			7	0.618831			5	0.572021			6	0.54399	14	0.168804
Number/Average negative						5	-0.164484			15	-0.980874			19	-0.978719			0	-			1	-0.358194			12	-0.985328			15	-1.21372			15	-1.57625			20	-1.73949			19	-1.85007	11	-0.185094	6

## Sheet: S4 - p-values
Table S4: p-values calculated from pairwise comparison of measured metabolite concentrations
			Sample Preparation Methods
Pulse Sequence	Fit Method	Metabolite	Reference	Comparison	FDR P-value
NOESY	ASSISTED FIT	2-Hydroxybutyrate	PRECIPITATED	FILTERED	p < 0.001
NOESY	ASSISTED FIT	3-Hydroxybutyrate	PRECIPITATED	FILTERED	p < 0.001
NOESY	ASSISTED FIT	Acetate	PRECIPITATED	FILTERED	p < 0.001
NOESY	ASSISTED FIT	Acetone	PRECIPITATED	FILTERED	NS
NOESY	ASSISTED FIT	Alanine	PRECIPITATED	FILTERED	p < 0.001
NOESY	ASSISTED FIT	Choline	PRECIPITATED	FILTERED	p < 0.001
NOESY	ASSISTED FIT	Citrate	PRECIPITATED	FILTERED	NS
NOESY	ASSISTED FIT	Creatine	PRECIPITATED	FILTERED	p < 0.05
NOESY	ASSISTED FIT	Creatinine	PRECIPITATED	FILTERED	p < 0.001
NOESY	ASSISTED FIT	Dimethyl sulfone	PRECIPITATED	FILTERED	p < 0.01
NOESY	ASSISTED FIT	Dimethylamine	PRECIPITATED	FILTERED	p < 0.01
NOESY	ASSISTED FIT	Formate	PRECIPITATED	FILTERED	p < 0.001
NOESY	ASSISTED FIT	Glucose	PRECIPITATED	FILTERED	p < 0.001
NOESY	ASSISTED FIT	Glutamate	PRECIPITATED	FILTERED	p < 0.05
NOESY	ASSISTED FIT	Glutamine	PRECIPITATED	FILTERED	p < 0.001
NOESY	ASSISTED FIT	Glycine	PRECIPITATED	FILTERED	NS
NOESY	ASSISTED FIT	Histidine	PRECIPITATED	FILTERED	p < 0.01
NOESY	ASSISTED FIT	Isoleucine	PRECIPITATED	FILTERED	p < 0.001
NOESY	ASSISTED FIT	Lactate	PRECIPITATED	FILTERED	p < 0.001
NOESY	ASSISTED FIT	Leucine	PRECIPITATED	FILTERED	p < 0.001
NOESY	ASSISTED FIT	Lysine	PRECIPITATED	FILTERED	p < 0.001
NOESY	ASSISTED FIT	Phenylalanine	PRECIPITATED	FILTERED	p < 0.001
NOESY	ASSISTED FIT	Pyruvate	PRECIPITATED	FILTERED	p < 0.001
NOESY	ASSISTED FIT	Tyrosine	PRECIPITATED	FILTERED	p < 0.001
NOESY	ASSISTED FIT	Valine	PRECIPITATED	FILTERED	p < 0.001
NOESY	BATCH FIT	2-Hydroxybutyrate	INTACT	FILTERED	NS
NOESY	BATCH FIT	2-Hydroxybutyrate	PRECIPITATED	FILTERED	p < 0.001
NOESY	BATCH FIT	2-Hydroxybutyrate	PRECIPITATED	INTACT	NS
NOESY	BATCH FIT	3-Hydroxybutyrate	INTACT	FILTERED	NS
NOESY	BATCH FIT	3-Hydroxybutyrate	PRECIPITATED	FILTERED	NS
NOESY	BATCH FIT	3-Hydroxybutyrate	PRECIPITATED	INTACT	NS
NOESY	BATCH FIT	Acetate	INTACT	FILTERED	NS
NOESY	BATCH FIT	Acetate	PRECIPITATED	FILTERED	p < 0.001
NOESY	BATCH FIT	Acetate	PRECIPITATED	INTACT	NS
NOESY	BATCH FIT	Acetone	INTACT	FILTERED	NS
NOESY	BATCH FIT	Acetone	PRECIPITATED	FILTERED	NS
NOESY	BATCH FIT	Acetone	PRECIPITATED	INTACT	NS
NOESY	BATCH FIT	Alanine	INTACT	FILTERED	p < 0.05
NOESY	BATCH FIT	Alanine	PRECIPITATED	FILTERED	p < 0.001
NOESY	BATCH FIT	Alanine	PRECIPITATED	INTACT	NS
NOESY	BATCH FIT	Choline	INTACT	FILTERED	NS
NOESY	BATCH FIT	Choline	PRECIPITATED	FILTERED	NS
NOESY	BATCH FIT	Choline	PRECIPITATED	INTACT	NS
NOESY	BATCH FIT	Citrate	INTACT	FILTERED	NS
NOESY	BATCH FIT	Citrate	PRECIPITATED	FILTERED	NS
NOESY	BATCH FIT	Citrate	PRECIPITATED	INTACT	NS
NOESY	BATCH FIT	Creatine	INTACT	FILTERED	NS
NOESY	BATCH FIT	Creatine	PRECIPITATED	FILTERED	NS
NOESY	BATCH FIT	Creatine	PRECIPITATED	INTACT	NS
NOESY	BATCH FIT	Creatinine	INTACT	FILTERED	NS
NOESY	BATCH FIT	Creatinine	PRECIPITATED	FILTERED	NS
NOESY	BATCH FIT	Creatinine	PRECIPITATED	INTACT	NS
NOESY	BATCH FIT	Dimethyl sulfone	INTACT	FILTERED	NS
NOESY	BATCH FIT	Dimethyl sulfone	PRECIPITATED	FILTERED	NS
NOESY	BATCH FIT	Dimethyl sulfone	PRECIPITATED	INTACT	NS
NOESY	BATCH FIT	Dimethylamine	INTACT	FILTERED	NS
NOESY	BATCH FIT	Dimethylamine	PRECIPITATED	FILTERED	NS
NOESY	BATCH FIT	Dimethylamine	PRECIPITATED	INTACT	NS
NOESY	BATCH FIT	Formate	INTACT	FILTERED	NS
NOESY	BATCH FIT	Formate	PRECIPITATED	FILTERED	p < 0.001
NOESY	BATCH FIT	Formate	PRECIPITATED	INTACT	NS
NOESY	BATCH FIT	Glucose	INTACT	FILTERED	NS
NOESY	BATCH FIT	Glucose	PRECIPITATED	FILTERED	p < 0.01
NOESY	BATCH FIT	Glucose	PRECIPITATED	INTACT	NS
NOESY	BATCH FIT	Glutamate	INTACT	FILTERED	NS
NOESY	BATCH FIT	Glutamate	PRECIPITATED	FILTERED	NS
NOESY	BATCH FIT	Glutamate	PRECIPITATED	INTACT	NS
NOESY	BATCH FIT	Glutamine	INTACT	FILTERED	NS
NOESY	BATCH FIT	Glutamine	PRECIPITATED	FILTERED	p < 0.001
NOESY	BATCH FIT	Glutamine	PRECIPITATED	INTACT	NS
NOESY	BATCH FIT	Glycine	INTACT	FILTERED	NS
NOESY	BATCH FIT	Glycine	PRECIPITATED	FILTERED	NS
NOESY	BATCH FIT	Glycine	PRECIPITATED	INTACT	NS
NOESY	BATCH FIT	Histidine	INTACT	FILTERED	NS
NOESY	BATCH FIT	Histidine	PRECIPITATED	FILTERED	NS
NOESY	BATCH FIT	Histidine	PRECIPITATED	INTACT	NS
NOESY	BATCH FIT	Isoleucine	INTACT	FILTERED	p < 0.05
NOESY	BATCH FIT	Isoleucine	PRECIPITATED	FILTERED	p < 0.01
NOESY	BATCH FIT	Isoleucine	PRECIPITATED	INTACT	NS
NOESY	BATCH FIT	Lactate	INTACT	FILTERED	NS
NOESY	BATCH FIT	Lactate	PRECIPITATED	FILTERED	NS
NOESY	BATCH FIT	Lactate	PRECIPITATED	INTACT	NS
NOESY	BATCH FIT	Leucine	INTACT	FILTERED	p < 0.01
NOESY	BATCH FIT	Leucine	PRECIPITATED	FILTERED	NS
NOESY	BATCH FIT	Leucine	PRECIPITATED	INTACT	p < 0.001
NOESY	BATCH FIT	Lysine	INTACT	FILTERED	p < 0.05
NOESY	BATCH FIT	Lysine	PRECIPITATED	FILTERED	NS
NOESY	BATCH FIT	Lysine	PRECIPITATED	INTACT	NS
NOESY	BATCH FIT	Phenylalanine	INTACT	FILTERED	NS
NOESY	BATCH FIT	Phenylalanine	PRECIPITATED	FILTERED	NS
NOESY	BATCH FIT	Phenylalanine	PRECIPITATED	INTACT	NS
NOESY	BATCH FIT	Pyruvate	INTACT	FILTERED	NS
NOESY	BATCH FIT	Pyruvate	PRECIPITATED	FILTERED	p < 0.001
NOESY	BATCH FIT	Pyruvate	PRECIPITATED	INTACT	NS
NOESY	BATCH FIT	Tyrosine	INTACT	FILTERED	NS
NOESY	BATCH FIT	Tyrosine	PRECIPITATED	FILTERED	p < 0.01
NOESY	BATCH FIT	Tyrosine	PRECIPITATED	INTACT	NS
NOESY	BATCH FIT	Valine	INTACT	FILTERED	p < 0.05
NOESY	BATCH FIT	Valine	PRECIPITATED	FILTERED	p < 0.001
NOESY	BATCH FIT	Valine	PRECIPITATED	INTACT	NS
NOESY	MANUAL FIT	2-Hydroxybutyrate	PRECIPITATED	FILTERED	p < 0.001
NOESY	MANUAL FIT	3-Hydroxybutyrate	PRECIPITATED	FILTERED	p < 0.001
NOESY	MANUAL FIT	Acetate	PRECIPITATED	FILTERED	p < 0.001
NOESY	MANUAL FIT	Acetone	PRECIPITATED	FILTERED	p < 0.05
NOESY	MANUAL FIT	Alanine	PRECIPITATED	FILTERED	p < 0.001
NOESY	MANUAL FIT	Choline	PRECIPITATED	FILTERED	p < 0.001
NOESY	MANUAL FIT	Citrate	PRECIPITATED	FILTERED	NS
NOESY	MANUAL FIT	Creatine	PRECIPITATED	FILTERED	p < 0.05
NOESY	MANUAL FIT	Creatinine	PRECIPITATED	FILTERED	p < 0.001
NOESY	MANUAL FIT	Dimethyl sulfone	PRECIPITATED	FILTERED	p < 0.01
NOESY	MANUAL FIT	Dimethylamine	PRECIPITATED	FILTERED	p < 0.01
NOESY	MANUAL FIT	Formate	PRECIPITATED	FILTERED	p < 0.001
NOESY	MANUAL FIT	Glucose	PRECIPITATED	FILTERED	p < 0.001
NOESY	MANUAL FIT	Glutamate	PRECIPITATED	FILTERED	p < 0.05
NOESY	MANUAL FIT	Glutamine	PRECIPITATED	FILTERED	p < 0.001
NOESY	MANUAL FIT	Glycine	PRECIPITATED	FILTERED	NS
NOESY	MANUAL FIT	Histidine	PRECIPITATED	FILTERED	p < 0.001
NOESY	MANUAL FIT	Isoleucine	PRECIPITATED	FILTERED	p < 0.001
NOESY	MANUAL FIT	Lactate	PRECIPITATED	FILTERED	p < 0.001
NOESY	MANUAL FIT	Leucine	PRECIPITATED	FILTERED	p < 0.001
NOESY	MANUAL FIT	Lysine	PRECIPITATED	FILTERED	p < 0.001
NOESY	MANUAL FIT	Phenylalanine	PRECIPITATED	FILTERED	p < 0.001
NOESY	MANUAL FIT	Pyruvate	PRECIPITATED	FILTERED	p < 0.001
NOESY	MANUAL FIT	Tyrosine	PRECIPITATED	FILTERED	p < 0.001
NOESY	MANUAL FIT	Valine	PRECIPITATED	FILTERED	p < 0.001
NOESY	SMOLESY	2-Hydroxybutyrate	INTACT	FILTERED	p < 0.001
NOESY	SMOLESY	2-Hydroxybutyrate	PRECIPITATED	FILTERED	NS
NOESY	SMOLESY	2-Hydroxybutyrate	PRECIPITATED	INTACT	p < 0.001
NOESY	SMOLESY	3-Hydroxybutyrate	INTACT	FILTERED	NS
NOESY	SMOLESY	3-Hydroxybutyrate	PRECIPITATED	FILTERED	NS
NOESY	SMOLESY	3-Hydroxybutyrate	PRECIPITATED	INTACT	NS
NOESY	SMOLESY	Acetate	INTACT	FILTERED	p < 0.01
NOESY	SMOLESY	Acetate	PRECIPITATED	FILTERED	NS
NOESY	SMOLESY	Acetate	PRECIPITATED	INTACT	p < 0.01
NOESY	SMOLESY	Acetone	INTACT	FILTERED	p < 0.001
NOESY	SMOLESY	Acetone	PRECIPITATED	FILTERED	NS
NOESY	SMOLESY	Acetone	PRECIPITATED	INTACT	p < 0.001
NOESY	SMOLESY	Alanine	INTACT	FILTERED	p < 0.01
NOESY	SMOLESY	Alanine	PRECIPITATED	FILTERED	p < 0.001
NOESY	SMOLESY	Alanine	PRECIPITATED	INTACT	p < 0.001
NOESY	SMOLESY	Choline	INTACT	FILTERED	p < 0.001
NOESY	SMOLESY	Choline	PRECIPITATED	FILTERED	NS
NOESY	SMOLESY	Choline	PRECIPITATED	INTACT	p < 0.001
NOESY	SMOLESY	Citrate	INTACT	FILTERED	p < 0.001
NOESY	SMOLESY	Citrate	PRECIPITATED	FILTERED	p < 0.001
NOESY	SMOLESY	Citrate	PRECIPITATED	INTACT	p < 0.001
NOESY	SMOLESY	Creatine	INTACT	FILTERED	p < 0.001
NOESY	SMOLESY	Creatine	PRECIPITATED	FILTERED	NS
NOESY	SMOLESY	Creatine	PRECIPITATED	INTACT	p < 0.001
NOESY	SMOLESY	Creatinine	INTACT	FILTERED	p < 0.01
NOESY	SMOLESY	Creatinine	PRECIPITATED	FILTERED	NS
NOESY	SMOLESY	Creatinine	PRECIPITATED	INTACT	NS
NOESY	SMOLESY	Dimethyl sulfone	INTACT	FILTERED	NS
NOESY	SMOLESY	Dimethyl sulfone	PRECIPITATED	FILTERED	NS
NOESY	SMOLESY	Dimethyl sulfone	PRECIPITATED	INTACT	NS
NOESY	SMOLESY	Dimethylamine	INTACT	FILTERED	NS
NOESY	SMOLESY	Dimethylamine	PRECIPITATED	FILTERED	NS
NOESY	SMOLESY	Dimethylamine	PRECIPITATED	INTACT	NS
NOESY	SMOLESY	Formate	INTACT	FILTERED	p < 0.001
NOESY	SMOLESY	Formate	PRECIPITATED	FILTERED	p < 0.001
NOESY	SMOLESY	Formate	PRECIPITATED	INTACT	NS
NOESY	SMOLESY	Glucose	INTACT	FILTERED	p < 0.001
NOESY	SMOLESY	Glucose	PRECIPITATED	FILTERED	NS
NOESY	SMOLESY	Glucose	PRECIPITATED	INTACT	p < 0.001
NOESY	SMOLESY	Glutamate	INTACT	FILTERED	NS
NOESY	SMOLESY	Glutamate	PRECIPITATED	FILTERED	NS
NOESY	SMOLESY	Glutamate	PRECIPITATED	INTACT	NS
NOESY	SMOLESY	Glutamine	INTACT	FILTERED	p < 0.001
NOESY	SMOLESY	Glutamine	PRECIPITATED	FILTERED	p < 0.01
NOESY	SMOLESY	Glutamine	PRECIPITATED	INTACT	p < 0.001
NOESY	SMOLESY	Glycine	INTACT	FILTERED	p < 0.001
NOESY	SMOLESY	Glycine	PRECIPITATED	FILTERED	p < 0.001
NOESY	SMOLESY	Glycine	PRECIPITATED	INTACT	p < 0.001
NOESY	SMOLESY	Histidine	INTACT	FILTERED	p < 0.001
NOESY	SMOLESY	Histidine	PRECIPITATED	FILTERED	NS
NOESY	SMOLESY	Histidine	PRECIPITATED	INTACT	p < 0.001
NOESY	SMOLESY	Isoleucine	INTACT	FILTERED	p < 0.001
NOESY	SMOLESY	Isoleucine	PRECIPITATED	FILTERED	p < 0.001
NOESY	SMOLESY	Isoleucine	PRECIPITATED	INTACT	NS
NOESY	SMOLESY	Lactate	INTACT	FILTERED	p < 0.001
NOESY	SMOLESY	Lactate	PRECIPITATED	FILTERED	NS
NOESY	SMOLESY	Lactate	PRECIPITATED	INTACT	p < 0.001
NOESY	SMOLESY	Leucine	INTACT	FILTERED	p < 0.001
NOESY	SMOLESY	Leucine	PRECIPITATED	FILTERED	p < 0.001
NOESY	SMOLESY	Leucine	PRECIPITATED	INTACT	NS
NOESY	SMOLESY	Lysine	INTACT	FILTERED	p < 0.001
NOESY	SMOLESY	Lysine	PRECIPITATED	FILTERED	NS
NOESY	SMOLESY	Lysine	PRECIPITATED	INTACT	p < 0.001
NOESY	SMOLESY	Phenylalanine	INTACT	FILTERED	p < 0.05
NOESY	SMOLESY	Phenylalanine	PRECIPITATED	FILTERED	p < 0.001
NOESY	SMOLESY	Phenylalanine	PRECIPITATED	INTACT	p < 0.001
NOESY	SMOLESY	Pyruvate	INTACT	FILTERED	NS
NOESY	SMOLESY	Pyruvate	PRECIPITATED	FILTERED	NS
NOESY	SMOLESY	Pyruvate	PRECIPITATED	INTACT	NS
NOESY	SMOLESY	Tyrosine	INTACT	FILTERED	p < 0.001
NOESY	SMOLESY	Tyrosine	PRECIPITATED	FILTERED	p < 0.01
NOESY	SMOLESY	Tyrosine	PRECIPITATED	INTACT	NS
NOESY	SMOLESY	Valine	INTACT	FILTERED	p < 0.001
NOESY	SMOLESY	Valine	PRECIPITATED	FILTERED	NS
NOESY	SMOLESY	Valine	PRECIPITATED	INTACT	p < 0.001

## Sheet: S5 - CV p-values
Table S5: P-values from pairwise comparison of CV values
		Precipitated				Filtered				Intact
		Chenomx - Manual Fit	Chenomx - Assisted Fit	Chenomx - Batch Fit	SMolESY	Chenomx - Manual Fit	Chenomx - Assisted Fit	Chenomx - Batch Fit	SMolESY	SMolESY-NOESY	SMolESY-NOESY
Precipitated
	Chenomx - Manual Fit	#DIV/0!	0.408351	0.605496	0.451387	5.25388e-05	0.000120703	0.0815069	0.146531	7.87053e-13	7.83078e-13
	Chenomx - Assisted Fit	0.408351	#DIV/0!	0.367242	0.380158	8.17445e-06	2.96221e-05	0.0509044	0.108333	2.2677e-13	2.25771e-13
	Chenomx - Batch Fit	0.605496	0.367242	#DIV/0!	0.898395	0.00177523	0.00449987	0.232699	0.472056	4.94045e-09	4.95816e-09
	SMolESY	0.451387	0.380158	0.898395	#DIV/0!	0.223232	0.000120703	0.621575	0.0165338	0.000533001	0.000532783
Filtered
	Chenomx - Manual Fit	5.25388e-05	8.17445e-06	0.00177523	0.223232	#DIV/0!	0.548307	0.0343816	0.58069	1.37257e-09	1.37483e-09
	Chenomx - Assisted Fit	0.000120703	2.96221e-05	0.00449987	0.241468	0.548307	#DIV/0!	0.0815069	0.616559	1.43123e-09	1.43357e-09
	Chenomx - Batch Fit	0.0815069	0.0509044	0.232699	0.621575	0.0343816	0.0391403	#DIV/0!	0.639763	2.19147e-07	2.19713e-07
	SMolESY	0.146531	0.108333	0.472056	0.0165338	0.58069	0.616559	0.639763	#DIV/0!	0.000995549	0.000995205
Intact
	SMolESY-NOESY	7.87053e-13	2.2677e-13	4.94045e-09	0.000533001	1.37257e-09	1.43123e-09	2.19147e-07	0.000995549	#DIV/0!	0.686218
	SMolESY-CPMG	7.83078e-13	2.25771e-13	4.95816e-09	0.000532783	1.37483e-09	1.43357e-09	2.19713e-07	0.000995205	0.686218	#DIV/0!

## Sheet: S6 - Comparative FC Table
Table S6: Comparative FC values
	METHOD/STUDY Precip/Filt FC												METHOD/STUDY/Precip/IntFC							Combined Data Sets
Metabolite	CHENOMX - BATCH FIT	CHENOMX - MANUAL FIT	Gowda	Madid-Gambin	SMOLESY	AVG(Gowda, Madid-Gambin,SMOLESY)	STDEV(Gowda, Madid-Gambin,SMOLESY)	%CV(Gowda, Madid-Gambin,SMOLESY)	%Diff (MANUAL-FIT,AVG)	%Diff (BATCH-FIT,AVG)		Metabolite	Madrid-Gambin	SMOLESY	%Diff	AVG	STDEV	CV %		Metabolite	AVG (PRECIP/FIT))	STDEV (PRECIP/FIT)	%CV (PRECIP/FIT)	AVG (PRECIP/INT)	STDEV (PRECIP/INT)	%CV (PRECIP/INT)	p-value
2-Hydroxybutyrate	9.28	4.49	1.01	1.84	1.28	1.37667	0.42336	0.307525	-2.2615	-5.74092		2-Hydroxybutyrate	1.68	5.04	-2	3.36	2.37588	0.707107		2-Hydroxybutyrate	1.37667	0.42336	0.307525	3.36	2.37588	0.707107	0.2232
3-Hydroxybutyrate	2.57	3.54	1	0.99	1.06	1.01667	0.0378594	0.0372387	-2.48197	-1.52787		3-Hydroxybutyrate	1.14	0.81	0.289474	0.975	0.233345	0.239328		3-Hydroxybutyrate	1.01667	0.0378594	0.0372387	0.975	0.233345	0.239328	0.7697
Acetate	2.15	2.85	1.63	1.09	1	1.24	0.340735	0.274786	-1.29839	-0.733871		Acetate	1.97	1.37	0.304569	1.67	0.424264	0.25405		Acetate	1.24	0.340735	0.274786	1.67	0.424264	0.25405	0.2912
Acetone	0.89	1.7		0.71	0.73	0.72	0.0141421	0.0196419	-1.36111	-0.236111		Acetone	0.6	0.21	0.65	0.405	0.275772	0.680918		Acetone	0.72	0.0141421	0.0196419	0.405	0.275772	0.680918	0.1268
Alanine	1.74	2.12	1.05	0.81	0.66	0.84	0.196723	0.234194	-1.52381	-1.07143		Alanine	1.14	0.56	0.508772	0.85	0.410122	0.482496		Alanine	0.84	0.196723	0.234194	0.85	0.410122	0.482496	0.972
Choline	-	4.04	1.24	1.02	1.27	1.17667	0.136504	0.116009	-2.43343	-		Choline	1.23	0.55	0.552846	0.89	0.480833	0.540261		Choline	1.17667	0.136504	0.116009	0.89	0.480833	0.540261	0.0808
Citrate	0.09	1.39	0.61	0.44	0.34	0.463333	0.136504	0.294613	-2	0.805755		Citrate	0.74	0.22	0.702703	0.48	0.367696	0.766032		Citrate	0.463333	0.136504	0.294613	0.48	0.367696	0.766032	0.9336
Creatine	1.48	2.1	1.11	0.96	1.33	1.13333	0.1861	0.164206	-0.852941	-0.305882		Creatine	1.02	0.59	0.421569	0.805	0.304056	0.377709		Creatine	1.13333	0.1861	0.164206	0.805	0.304056	0.377709	0.2288
Creatinine	1.24	1.87	1.05	0.86	1.14	1.01667	0.142945	0.140602	-0.839344	-0.219672		Creatinine	1.54	0.9	0.415584	1.22	0.452548	0.370941		Creatinine	1.01667	0.142945	0.140602	1.22	0.452548	0.370941	0.4964
Formate	2.04	2.75	1.25	0.72	1.94	1.30333	0.611746	0.46937	-1.10997	-0.565217		Formate	0.93	0.86	0.0752688	0.895	0.0494975	0.0553044		Formate	1.30333	0.611746	0.46937	0.895	0.0494975	0.0553044	0.4444
Glucose	1.52	1.98	1.11	0.89	1.25	1.08333	0.181475	0.167516	-0.827692	-0.403077		Glucose	0.9	0.68	0.244444	0.79	0.155563	0.196916		Glucose	1.08333	0.181475	0.167516	0.79	0.155563	0.196916	0.1647
Glutamate	2.52	1.9	0.99	-	1.01	1	0.0141421	0.0141421	-0.9	-1.52		Glutamate	-	1.08	-	1.08	-	-		Glutamate	1	0.0141421	0.0141421	1.08	-	-	-
Glutamine	1.83	2.67	1.01	0.94	1.18	1.04333	0.123423	0.118297	-1.55911	-0.753994		Glutamine	1.23	0.57	0.536585	0.9	0.46669	0.518545		Glutamine	1.04333	0.123423	0.118297	0.9	0.46669	0.518545	0.6319
Glycine	1.53	1.57	1.12	0.97	0.4	0.83	0.379868	0.457673	-0.891566	-0.843373		Glycine	0.87	0.59	0.321839	0.73	0.19799	0.271219		Glycine	0.83	0.379868	0.457673	0.73	0.19799	0.271219	0.7625
Histidine	-	1.66	0.93	0.88	1.13	0.98	0.132288	0.134987	-0.693878	-		Histidine	0.93	0.63	0.322581	0.78	0.212132	0.271964		Histidine	0.98	0.132288	0.134987	0.78	0.212132	0.271964	0.2671
Isoleucine	3.8	2.45	1.15	0.9	1.34	1.13	0.220681	0.195293	-1.16814	-2.36283		Isoleucine	1.06	1.02	0.0377358	1.04	0.0282843	0.0271964		Isoleucine	1.13	0.220681	0.195293	1.04	0.0282843	0.0271964	0.6229
Lactate	1.25	1.83	0.96	0.86	1.01	0.943333	0.0763763	0.0809642	-0.939929	-0.325088		Lactate	1.29	1.55	-0.20155	1.42	0.183848	0.12947		Lactate	0.943333	0.0763763	0.0809642	1.42	0.183848	0.12947	0.0234
Leucine	7.62	2.31	1.1	0.92	1.3	1.10667	0.190088	0.171766	-1.08735	-5.88554		Leucine	1.08	0.97	0.101852	1.025	0.0777817	0.0758846		Leucine	1.10667	0.190088	0.171766	1.025	0.0777817	0.0758846	0.6258
Lysine	-	2.22	1.14	0.89	1.1	1.04333	0.134288	0.128711	-1.1278	-		Lysine	1.88	0.36	0.808511	1.12	1.0748	0.959645		Lysine	1.04333	0.134288	0.128711	1.12	1.0748	0.959645	0.8977
Phenylalanine	0.86	3.3	1.16	0.88	2.39	1.47667	0.803264	0.543971	-1.23476	0.417607		Phenylalanine	1.12	1.95	-0.741071	1.535	0.586899	0.382344		Phenylalanine	1.47667	0.803264	0.543971	1.535	0.586899	0.382344	0.9345
Succinate	1.47	2.24	-	1.02	-	1.02	-	-	-1.19608	-0.441176		Succinate	1.39	-	-	1.39	-	-		Tyrosine	1.08667	0.172434	0.158681	1.105	0.318198	0.287962	0.9304
Tyrosine	1.47	3.06	1.12	0.9	1.24	1.08667	0.172434	0.158681	-1.81595	-0.352761		Tyrosine	1.33	0.88	0.338346	1.105	0.318198	0.287962		Valine	1.06667	0.162891	0.15271	0.89	0.311127	0.349581	0.4391
Valine	1.69	2.51	1.14	0.88	1.18	1.06667	0.162891	0.15271	-1.35312	-0.584375		Valine	1.11	0.67	0.396396	0.89	0.311127	0.349581		AVG	1.04768	0.218993	0.199223	1.08932	0.427968	0.378327	0.427968
AVG	2.352	2.4587	1.08952	0.925909	1.14909	1.04768	0.218993	0.199223	-1.34599	-1.13249		AVG	1.19	1.00273	0.194593	1.10239	0.427968	0.378327		STD	0.212326	0.191178	0.142417	0.588956	0.500393	0.247508	0.500393
STD	2.23324	0.796283	0.182057	0.243499	0.437078	0.212326	0.191178	0.142417	0.523969	1.73828		STD	0.342706	0.991839	0.604171	0.578821	0.500393	0.247508

## Sheet: S7 - Outlier STDEV Analysis
Table S7: Standard Deviation IQR Outlier Analysis
Metabolite	All Data	Chenomx	CNX - BATCH - FILT	CNX - BATCH -PRECIP	CNX - ASST - FILT	CNX - ASST - PRECIP	CNX - MAN - FILT	CNX - MAN - PRECIP	SMOLESY	SMOLESY - FILT	SMOLESY - PRECIP	SMOLESY - INT
2-Hydroxybutyrate	0.164063	0.198769	0.0145864	0.217876	0.0555681	0.211829	0.0636805	0.192047	0.0975902	0.0696033	0.131973	0.0201357
3-Hydroxybutyrate	0.15992	0.126545	0.264837	0.351418	0.0611004	0.156394	0.0604174	0.157677	0.157993	0.177798	0.174439	0.108929
Acetate	0.145584	0.105842	0.0391118	0.136054	0.0263778	0.139696	0.0265671	0.141716	0.148717	0.149583	0.164603	0.11575
Acetone	0.152588	0.116517	0.0885727	0.141713	0.0863652	0.150769	0.0780335	0.15083	0.184784	0.131498	0.108799	0.148511
Alanine	0.142845	0.0943734	0.072229	0.165253	0.0239591	0.123259	0.0239628	0.127997	0.12018	0.0911354	0.0747124	0.137853
Choline	0.165425	0.118007	0.330719	-	0.0202804	0.152306	0.0202804	0.151063	0.159973	0.0554736	0.0786261	0.215222
Citrate	0.199899	0.100498	0.315	-	0.0696394	0.136821	0.0295333	0.136105	0.196438	0.0983351	0.0531866	0.159572
Creatine	0.138903	0.0903743	0.0305138	0.12958	0.0154061	0.124743	0.0246665	0.124303	0.157714	0.0976466	0.121993	0.188362
Creatinine	0.157586	0.131258	0.0987174	0.198331	0.0307509	0.128683	0.0661394	0.160425	0.140404	0.105381	0.129887	0.170942
Dimethyl sulfone	0.126705	0.117786	0.140021	0.434475	0.0821485	0.147271	0.0822741	0.147155	0.117235	0.107884	0.118098	0.123665
Dimethylamine	0.122802	0.12232	0.151984	0.533579	0.0266471	0.207128	0.0267697	0.2064	0.0987955	0.101717	0.119465	0.0684689
Formate	0.1251	0.0942706	0.0568743	0.16415	0.0176317	0.121344	0.0176317	0.122076	0.118443	0.0541489	0.131292	0.121627
Glucose	0.127026	0.127942	0.0559703	0.136654	0.0538896	0.168594	0.0552874	0.151339	0.125657	0.0887034	0.0982159	0.146574
Glutamate	0.170747	0.210495	0.227351	0.418748	0.172272	0.321158	0.172272	0.321158	0.144241	0.142205	0.132118	0.158699
Glutamine	0.169507	0.0987806	0.0899318	0.173165	0.0217346	0.122226	0.0262016	0.123501	0.143377	0.0662271	0.0740923	0.122693
Glycine	0.171199	0.0924794	0.0790953	0.122664	0.0507881	0.119427	0.0507901	0.119487	0.173973	0.163203	0.0920851	0.134209
Histidine	0.168845	0.109752	0.095853	-	0.0389018	0.147527	0.0371814	0.139677	0.168226	0.122006	0.132132	0.165024
Isoleucine	0.170418	0.101468	0.0583387	0.177266	0.0307534	0.125989	0.0270468	0.131619	0.131411	0.0916273	0.125892	0.152708
Lactate	0.184523	0.100734	0.130005	0.205276	0.0430746	0.128814	0.0430746	0.129018	0.19205	0.182799	0.211974	0.143003
Leucine	0.160454	0.106903	-	0.154037	0.0349256	0.132089	0.0356835	0.133144	0.126316	0.0968923	0.114436	0.145497
Lysine	0.224164	0.103427	0.00792523	-	0.035314	0.126145	0.0353223	0.125815	0.241404	0.0756028	0.0921565	0.123123
Phenylalanine	0.217298	0.100506	0.263113	0.539972	0.0274363	0.121224	0.0191711	0.122754	0.180663	0.0927613	0.161987	0.107543
Pyruvate	0.133773	0.0993031	0.0312903	0.129162	0.0300262	0.131207	0.0236204	0.124568	0.127976	0.113729	0.160424	0.0965008
Tyrosine	0.164451	0.0972838	0.144382	0.213652	0.0267944	0.119704	0.0249126	0.122521	0.113884	0.0793497	0.117136	0.122847
Valine	0.150323	0.0948575	0.0838013	0.172702	0.0229455	0.122225	0.020925	0.125875	0.115968	0.0635735	0.0814524	0.135155
